# Supplementary material for: Sensor system for analysis of biofilm sensitivity to ampicillin
Source: Springer Nature journal article supplement (doi:10.1007/s00253-023-12831-7), 2024-01-24
Supplement: MOESM1 [file 253_2023_12831_MOESM1_ESM.pdf]

## Supporting Information

### Sensor system for analysis of biofilm sensitivity to ampicillin

Olga I. Guliy<sup>a,\*</sup>, Stella S. Evstigneeva<sup>a</sup>, Alexander A. Shirokov<sup>a</sup>, Victor D. Bunin<sup>b</sup>

<sup>a</sup>*Institute of Biochemistry and Physiology of Plants and Microorganisms – Subdivision of the Federal State Budgetary Research Institution Saratov Federal Scientific Centre of the Russian Academy of Sciences (IBPPM RAS), Saratov 410049, Russia*

<sup>b</sup>*EloSystems GbR, Berlin, 13407, Germany*

### Table of contents

**Figure S1** The main scheme of the sensor measurement before and after antibiotic treatment

**Figure S2** Changes in the electro-optical signal in cell orientation (S<sub>1</sub>) and disorientation (S<sub>2</sub>)

**Figure S3** Polarization of boundaries between cell structures under the effect of an electric field

**Figure S4** Changes in the viability of *P. putida* TSh-18 biofilms after treatment with various ampicillin concentrations

**Table S1** Coefficient values for the polynomial function for calculating the average cell size on the basis of S<sub>relax</sub> on the selected time scale **T**

---

\*Corresponding author. Institute of Biochemistry and Physiology of Plants and Microorganisms – Subdivision of the Federal State Budgetary Research Institution Saratov Federal Scientific Centre of the Russian Academy of Sciences (IBPPM RAS), Saratov 410049, Russia. E-mail address: [guliy\\_olga@mail.ru](mailto:guliy_olga@mail.ru) (O.I. Guliy).

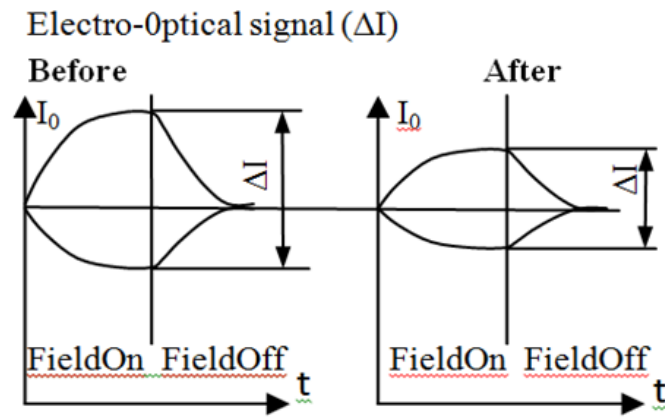

**Figure S1** The main scheme of the sensor measurement before and after antibiotic treatment

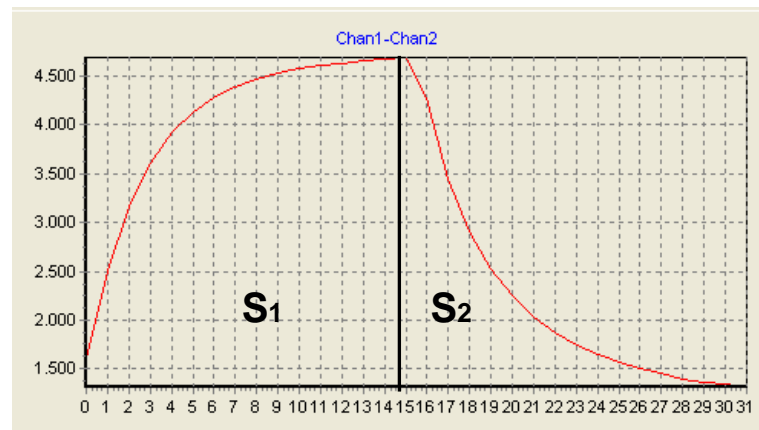

**Figure S2** Changes in the electro-optical signal in cell orientation ( $S_1$ ) and disorientation ( $S_2$ )

**Table S1** Coefficient values for the polynomial function for calculating the average cell size on the basis of  $S_{relax}$  on the selected time scale  $T$

| Y = A+B*X^C (KWD = $S_{relax}$ )                 |        |     |     |       |
|--------------------------------------------------|--------|-----|-----|-------|
| Cell size, $\mu\text{m}$ = A+B*( $S_{relax}$ )^C |        |     |     |       |
| Time                                             |        | A   | B   | C     |
| T4                                               | 2.0s   | 0.8 | 103 | -3.2  |
| T5                                               | 3.0 s  | 0.8 | 105 | -2.8  |
| T6                                               | 4.0 s  | 0.8 | 106 | -2.52 |
| T7                                               | 6.0 s  | 0.8 | 112 | -2.26 |
| T8                                               | 9.0 s  | 0.8 | 124 | -2.05 |
| T9                                               | 12.0 s | 0.8 | 148 | -1.91 |
| T10                                              | 18.0 s | 0.8 | 166 | -1.81 |

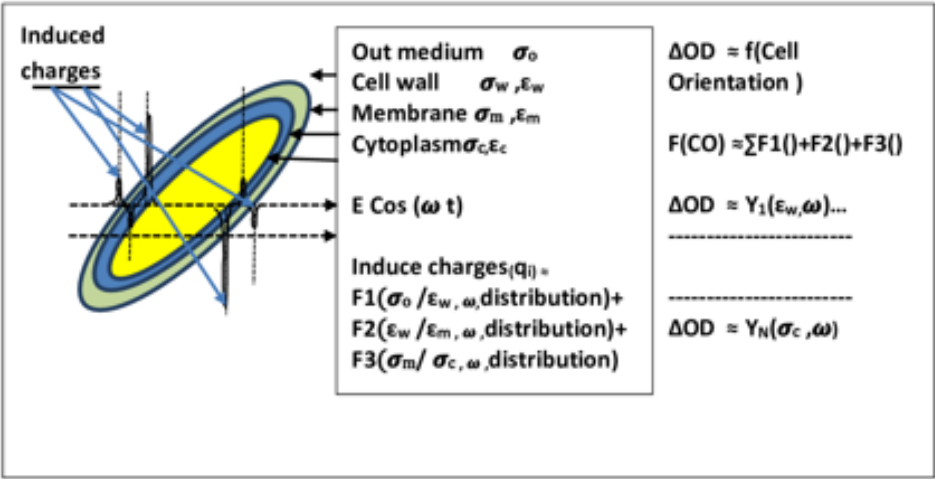

**Figure S3** Polarization of boundaries between cell structures under the effect of an electric field

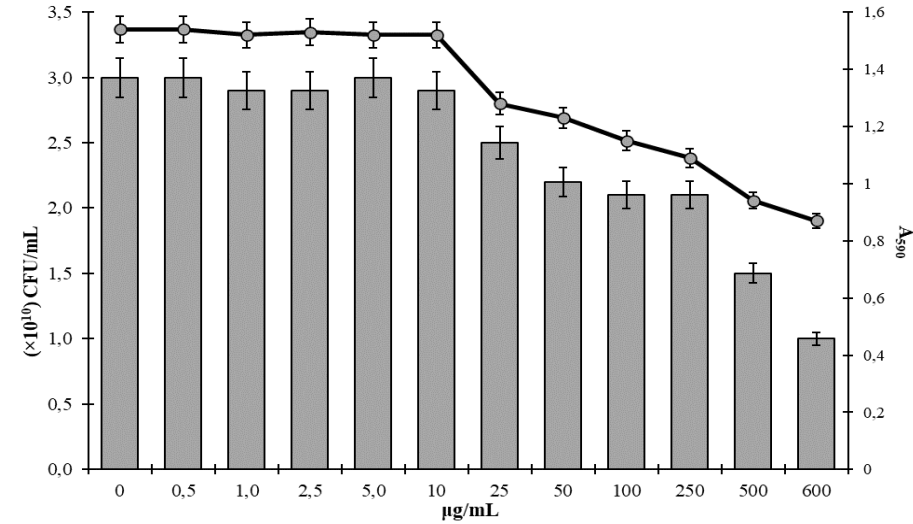

**Figure S4** Changes in the viability of *P. putida* TSh-18 biofilms after treatment with various ampicillin concentrations
